# Supplementary material for: Synthesis and Crystalline Structure of Zinc Complexes with Antihypertensive Drug Lisinopril
Source: Hindawi journal article supplement (doi:10.1155/2018/8910242), 2018-10-18
Supplement: f1 [file 8910242.f1.pdf]

## Supplementary material

### Structural Characterization of Zinc Complexes with Lisinopril Antihypertensive Drug

Márcia C. de Souza<sup>1</sup>, Luan F. Diniz<sup>1</sup>, Chris H. J. Franco<sup>1</sup> and Renata Diniz<sup>1,2</sup>

<sup>1</sup>Department of Chemistry, Federal University of Juiz de Fora, Juiz de Fora, Minas Gerais, 36036-900, Brazil.

<sup>2</sup>Department of Chemistry, Federal University of Minas Gerais, Belo Horizonte, Minas Gerais, 31270-901, Brazil.

\* Corresponding author. Electronic address: [dinizr@ufmg.br](mailto:dinizr@ufmg.br)

Tel: +55 (31) 3409-5763

Table S1: Atomic coordinates of Zn atoms into unit cell.

| Atom | Coordinates of atoms |             |              |
|------|----------------------|-------------|--------------|
|      | <i>x</i>             | <i>y</i>    | <i>z</i>     |
| Zn1  | 0.40114 (4)          | 0.54938 (4) | 0.44526 (8)  |
| Zn2  | 0.63506 (5)          | 0.57444 (4) | -0.21025 (8) |
| Zn3  | 0.42754 (3)          | 0.33144 (4) | 0.11970 (7)  |
| Zn4  | 0.95650 (5)          | 0.85183 (4) | 0.12304 (8)  |

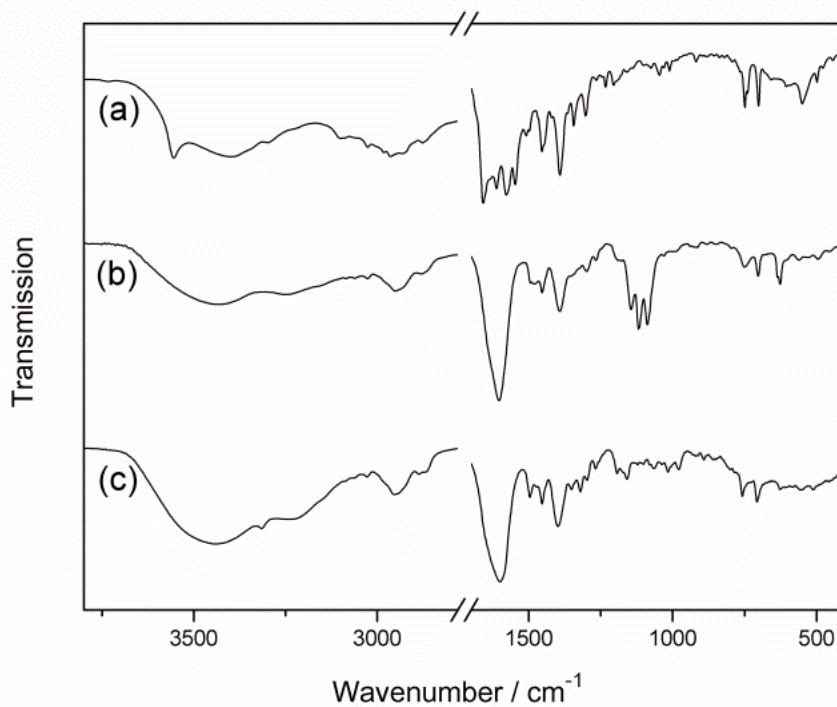

Figure S1: Infrared spectra of compounds: (a) Lisinopril, (b) LISZn1 and (c) LISZn2.

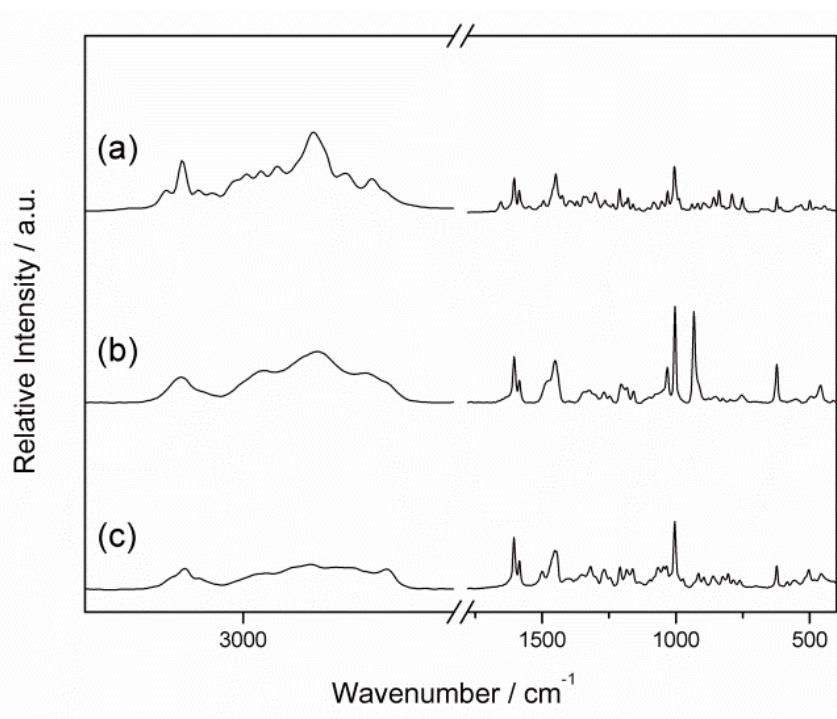

Figure S2: Raman spectra of compounds: (a) Lisinopril, (b) LISZn1 and (c) LISZn2.

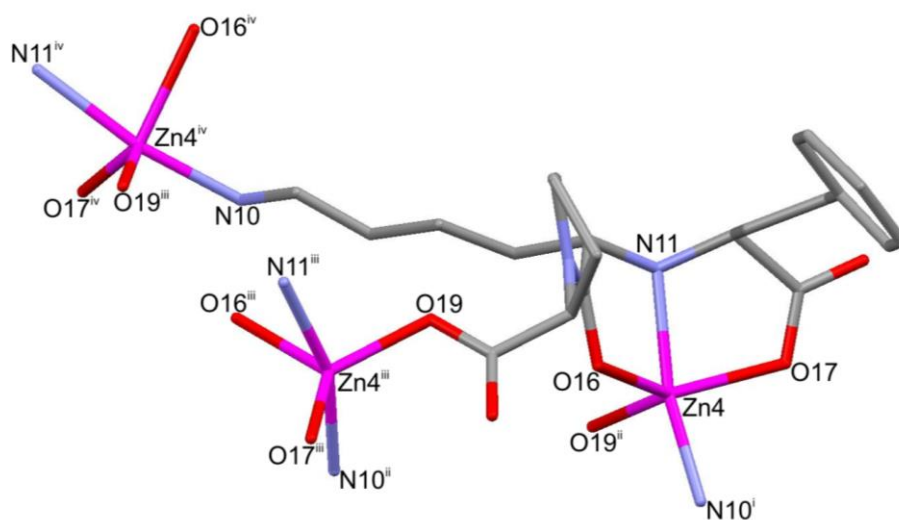

Figure S3: Polymeric structure of LISZn. Symmetry codes: (i)  $2-y, 1+x-y, 2/3+z$ ; (ii)  $1-x+y, 2-x, 1/3+z$ ; (iii)  $2-y, 1+x-y, -1/3+z$ ; (iv)  $1-x+y, 2-x, -2/3+z$ .

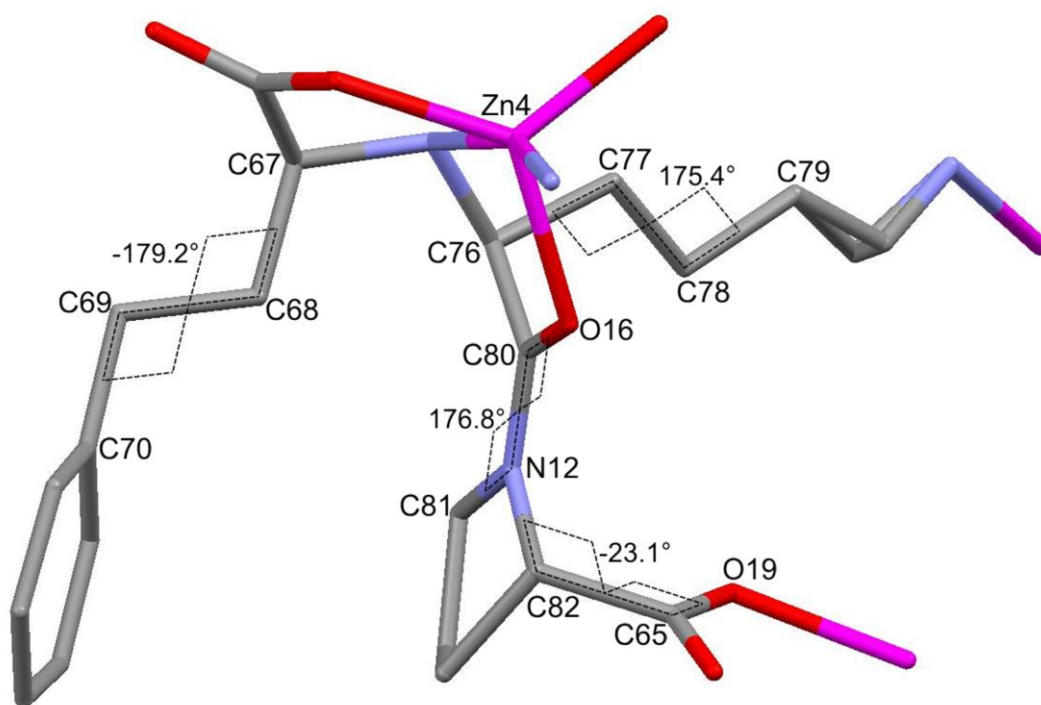

Figure S.4: Dihedral angles of the LISZn complex.
